# Supplementary material
Source: publisher figshare collection journal article supplement (https://acs.figshare.com/ndownloader/files/18039149)
Supplement: Supplementary file 1 [file 18039149]

# Supporting Information

## Surface Wettability-Directed Propulsion of Glucose-Powered Nanoflask Motors

*Changyong Gao<sup>†</sup>, Chang Zhou<sup>†</sup>, Zihua Lin<sup>†</sup>, Mingcheng Yang<sup>‡,\*</sup>, Qiang He<sup>†,\*</sup>*

[<sup>†</sup>] Key Laboratory of Microsystems and Microstructures Manufacturing, Ministry of Education, Micro/Nanotechnology Research Centre, Harbin Institute of Technology, Yi Kuang Jie 2, Harbin 150080, China

[<sup>‡</sup>] Beijing National Laboratory for Condensed Matter Physics and Key Laboratory of Soft Matter Physics, Institute of Physics, Chinese Academy of Sciences, Beijing 100190, China

E-mail: mcyang@iphy.ac.cn; qianghe@hit.edu.cn

**KEYWORDS:** colloidal motor, self-propulsion, phoresis, enzymatic catalysis, flow simulation

**Figure S1.** Water contact angle of a hydrophilic nanoflask (L-CNF) and a hydrophobic nanoflask (B-CNF) monolayer.

**Figure S2.** Characterization of B-CNF motors.

**Figure S3.** SEM images of CNF motors.

**Figure S4.** TEM images of L-CNF motors infused enzymes for different perfusion times.

**Figure S5.** GOx activity assay of B-CNF motors.

**Figure S6.** Cat activity assay of B-CNF motors.

**Figure S7.** The propulsion velocity of three types of B-CNF motors in different substrates.

**Figure S8.** The SEM images of L-CNF motors with different neck length..

**Video S1.** Motion of L-CNF motors in 10 mM glucose solution.

**Video S2.** Motion of B-CNF motors in 10 mM glucose solution.

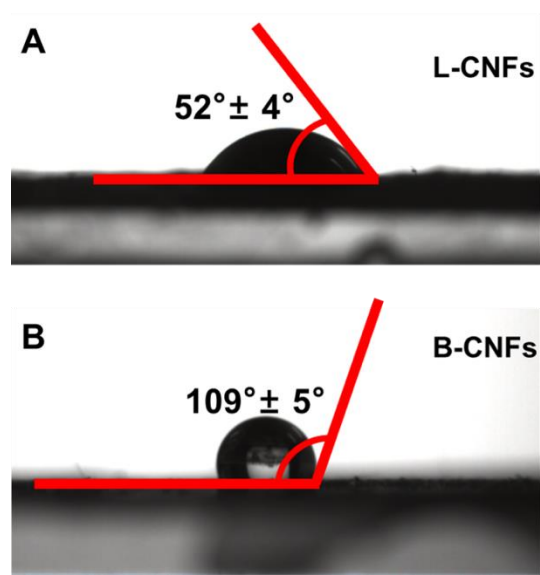

**Figure S1.** Water contact angle of a hydrophilic nanoflask (L-CNF) and a hydrophobic nanoflask (B-CNF) monolayer.

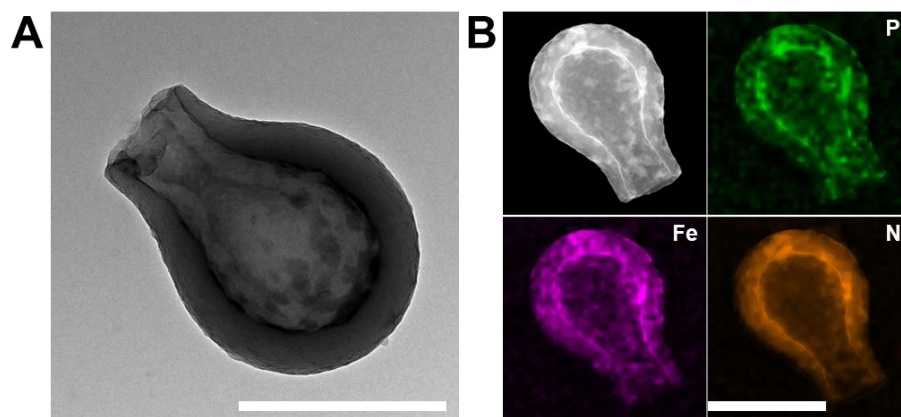

**Figure S2.** Characterization of hydrophobic nanoflask (B-CNF) nanomotors. (A) TEM image of a B-CNF motor. (B) A STEM image of B-CNF motor and corresponding EDX mapping images. Scale bar: 500 nm.

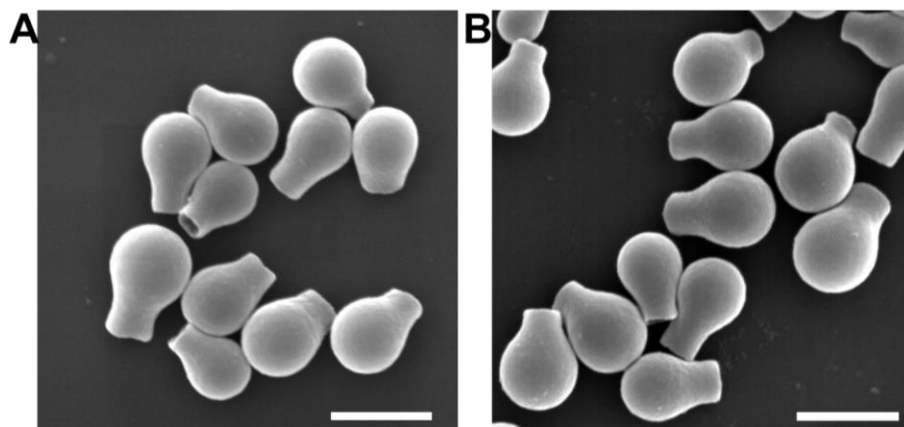

**Figure S3.** SEM images of CNF motors. (A) SEM image of L-CNF motors. (B) SEM image of B-CNF motors. Scale bar: 1  $\mu\text{m}$ .

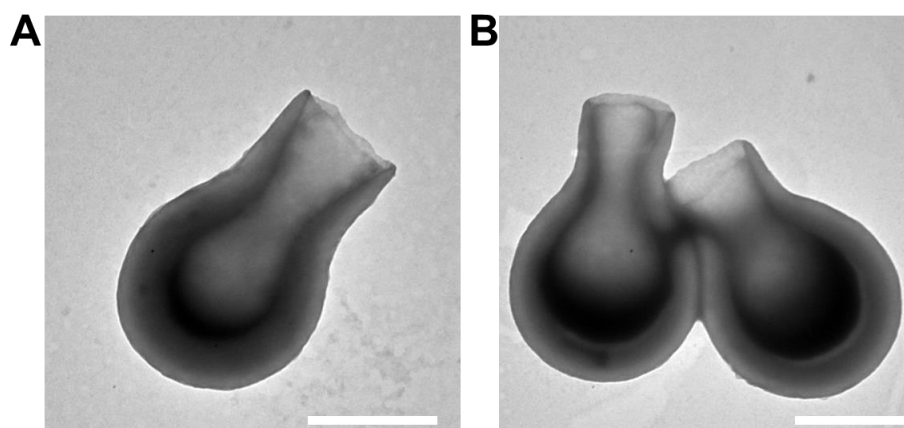

**Figure S4.** TEM images of L-CNF motors infused enzymes for different perfusion times. (A) TEM image of L-CNF motors infused enzymes for three times. (B) TEM image of L-CNF motors infused enzymes for five times. Scale bar: 500 nm.

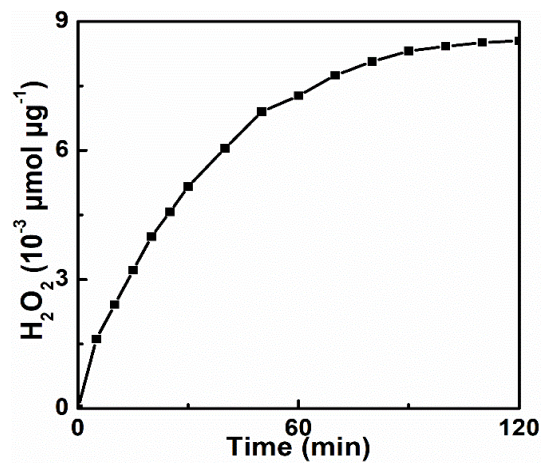

Figure S5. GOx activity assay of B-CNF motors.

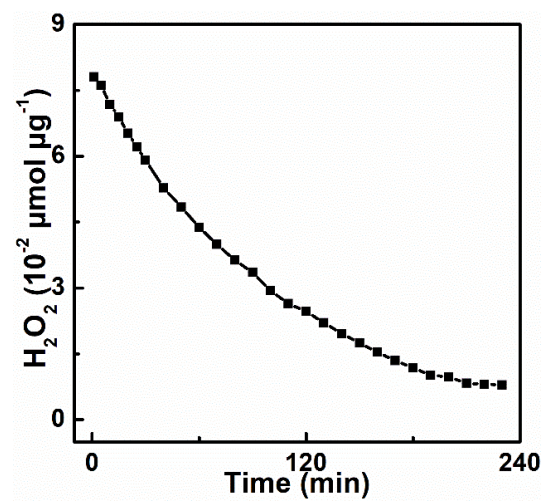

Figure S6. Cat activity assay of B-CNF motors.

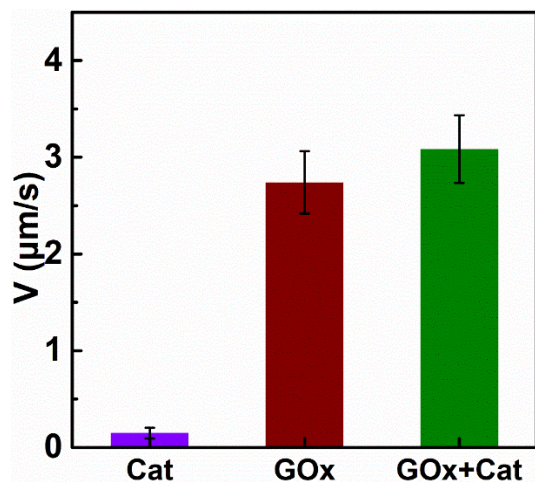

**Figure S7.** The propulsion velocity of three types of B-CNF motors in different substrates. The substrate of Cat-motors is  $\text{H}_2\text{O}_2$ , the substrate of the GOx-motors and (GOx+Cat)-motors is the glucose.

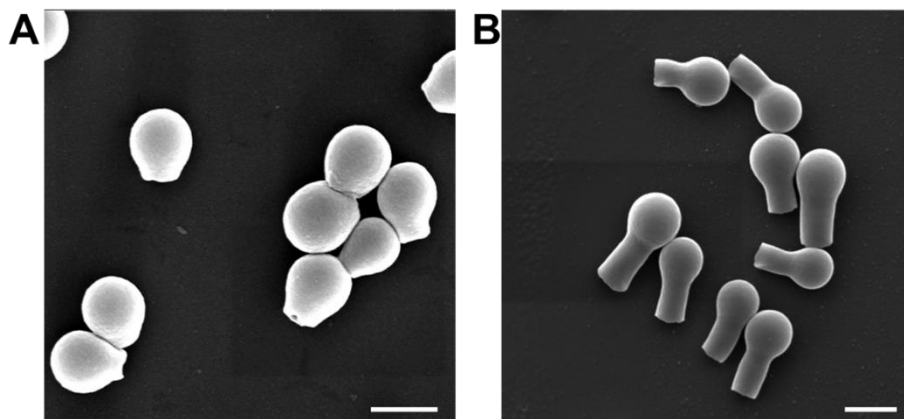

**Figure S8.** The SEM images of L-CNF motors with different neck length. L-CNF motors prepared by controlling the hydrothermal time for 8 h (A) and 21 h (B). Scale bar: 500 nm.
